# Supplementary material for: Pioneer Tree Bellucia imperialis (Melastomataceae) from Central Amazon with Seedlings Highly Dependent on Arbuscular Mycorrhizal Fungi
Source: MDPI journal article supplement (doi:10.3390/jof9050540), 2023-05-02
Supplement: s1 [file s1]

**Table S3.** ANOVA results for the variables Shoot Fresh Mass (SFM), Leaf Area (LA), Shoot Dry Mass (SDM), Root Fresh Mass (RFM), Mycorrhizal Colonization (MC); Number of Mycorrhizal Spores (NMS), and Shoot P Concentration (SPC). Predictor variables are the different phosphorus dosages (Doses), AMF inoculation treatments (Inoc), and their interaction (Doses:Inoc).

| Response | Predictor   | Df | Sum Sq  | Mean Sq | F value | Pr(>F)  | CV (%) |
|----------|-------------|----|---------|---------|---------|---------|--------|
| SFM      | Doses       | 4  | 4.58    | 1.145   | 5.778   | 0.00294 | 40.53  |
|          | Inoc        | 1  | 0.044   | 0.0441  | 0.222   | 0.64227 |        |
|          | Doses: Inoc | 4  | 0.702   | 0.1754  | 0.885   | 0.49069 |        |
|          | Residuals   | 20 | 3.963   | 0.1982  |         |         |        |
| LA       | Doses       | 4  | 4672    | 1168.1  | 11.169  | 0.00010 | 34.78  |
|          | Inoc        | 1  | 112     | 112.3   | 1.074   | 0.31200 |        |
|          | Doses: Inoc | 4  | 550     | 137.4   | 1.314   | 0.29900 |        |
|          | Residuals   | 20 | 2092    | 104.6   |         |         |        |
| SDM      | Doses       | 4  | 0.25025 | 0.06256 | 5.853   | 0.00275 | 44.76  |
|          | Inoc        | 1  | 0.0032  | 0.0032  | 0.3     | 0.59015 |        |
|          | Doses: Inoc | 4  | 0.03261 | 0.00815 | 0.763   | 0.56180 |        |
|          | Residuals   | 20 | 0.2138  | 0.01069 |         |         |        |
| RFM      | Doses       | 4  | 9.5     | 2.375   | 3.153   | 0.03660 | 46,34  |
|          | Inoc        | 1  | 2.46    | 2.4596  | 3.265   | 0.08580 |        |
|          | Doses: Inoc | 4  | 3.527   | 0.8818  | 1.171   | 0.35350 |        |
|          | Residuals   | 20 | 15.066  | 0.7533  |         |         |        |
| MC       | Doses       | 4  | 2180    | 545     | 2.439   | 0.08053 | 31.41  |
|          | Inoc        | 1  | 3529    | 3529    | 15.788  | 0.00075 |        |
|          | Doses: Inoc | 4  | 1705    | 426     | 1.908   | 0.14854 |        |
|          | Residuals   | 20 | 4470    | 223     |         |         |        |
| NMS      | Doses       | 4  | 391405  | 97851   | 0.584   | 0.67800 | 111.77 |
|          | Inoc        | 1  | 1101317 | 1101317 | 6.57    | 0.01850 |        |
|          | Doses: Inoc | 4  | 635456  | 158864  | 0.948   | 0.45720 |        |
|          | Residuals   | 20 | 3352753 | 167638  |         |         |        |
| SPC      | Doses       | 4  | 4.332   | 1.0829  | 6.542   | 0.00155 | 39,37  |
|          | Inoc        | 1  | 0.847   | 0.8467  | 5.115   | 0.03502 |        |
|          | Doses: Inoc | 4  | 0.916   | 0.229   | 1.383   | 0.27539 |        |
|          | Residuals   | 20 | 3.311   | 0.1655  |         |         |        |

Degrees of freedom (Df), Sum of squares (Sum Sq), Mean square (Mean Sq) and P-value (Pr>F) of F test. CV (%) - Coefficient of Variation.
