# Supplementary material for: Pioneer Tree Bellucia imperialis (Melastomataceae) from Central Amazon with Seedlings Highly Dependent on Arbuscular Mycorrhizal Fungi
Source: MDPI journal article supplement (doi:10.3390/jof9050540), 2023-05-02
Supplement: s1 [file s1]

**Table S1.** Chemical composition and the final concentration of modified Hoagland and Arnon (1950) nutrient solution to one-tenth of strength and different P levels for mycorrhizal dependency experiment.

| Stock solution | Reagent             | Chemical composition                                 | Concentration in the nutrient solution ( $\mu\text{M}$ ) | Pipetted volume ( $\text{mL.L}^{-1}$ ) of Stock solutions at different levels of P |                   |                 |                  |                   |
|----------------|---------------------|------------------------------------------------------|----------------------------------------------------------|------------------------------------------------------------------------------------|-------------------|-----------------|------------------|-------------------|
|                |                     |                                                      |                                                          | 0.0001 $\mu\text{M}$                                                               | 0.1 $\mu\text{M}$ | 1 $\mu\text{M}$ | 10 $\mu\text{M}$ | 100 $\mu\text{M}$ |
| 1              | Potassium phosphate | $\text{KH}_2\text{PO}_4$                             | 0–100                                                    | 0.00001                                                                            | 0.01              | 0.1             | 1.0              | 10.0              |
| 2              | Potassium chloride  | KCl                                                  | 500–600                                                  | 6.0                                                                                | 6.0               | 6.0             | 5.9              | 5.0               |
| 3              | Ammonium sulfate    | $(\text{NH}_4)_2\text{SO}_4$                         | 380                                                      | 3.8                                                                                | 3.8               | 3.8             | 3.8              | 3.8               |
| 4              | Calcium nitrate     | $\text{Ca}(\text{NO}_3)_2 \cdot 4\text{H}_2\text{O}$ | 380                                                      | 3.8                                                                                | 3.8               | 3.8             | 3.8              | 3.8               |
| 5              | Magnesium sulfate   | $\text{MgSO}_4 \cdot 7\text{H}_2\text{O}$            | 200                                                      | 2.0                                                                                | 2.0               | 2.0             | 2.0              | 2.0               |
| 6              | EDTA-Iron           | $\text{C}_{10}\text{H}_{12}\text{FeN}_2\text{NaO}_8$ | 6.13                                                     | 0.3                                                                                | 0.3               | 0.3             | 0.3              | 0.3               |
|                | Boric acid          | $\text{H}_3\text{BO}_3$                              | 4.63                                                     |                                                                                    |                   |                 |                  |                   |
|                | Manganese chloride  | $\text{MnCl}_2 \cdot 4\text{H}_2\text{O}$            | 0.915                                                    |                                                                                    |                   |                 |                  |                   |
|                | Zinc sulfate        | $\text{ZnSO}_4 \cdot 7\text{H}_2\text{O}$            | 0.077                                                    |                                                                                    |                   |                 |                  |                   |
| 7              | Copper sulfate      | $\text{CuSO}_4 \cdot 5\text{H}_2\text{O}$            | 0.032                                                    | 0.1                                                                                | 0.1               | 0.1             | 0.1              | 0.1               |
|                | Cobalte chloride    | $\text{CoCl}_2 \cdot 6\text{H}_2\text{O}$            | 0.010                                                    |                                                                                    |                   |                 |                  |                   |
|                | Sodium molybdate    | $\text{Na}_2\text{MoO}_4 \cdot 2\text{H}_2\text{O}$  | 0.050                                                    |                                                                                    |                   |                 |                  |                   |
| 8              | MES buffer*         | $\text{C}_6\text{H}_{13}\text{NO}_4\text{S}$         | 500                                                      | 1.0                                                                                | 1.0               | 1.0             | 1.0              | 1.0               |

\*4-morpholine ethanesulfonic acid. The pH of the solution was adjusted to 6.5
